# Supplementary material for: Compromise between mechanical and chemical protection mechanisms in the system of the bivalve Mytilus edulis shell
Source: Oxford University Press journal article supplement (doi:10.1242/jeb.201103), 2019-01-01
Supplement: jeb201103supp.pdf [file jeb201103supp.pdf]

## Supplementary Materials

**Table S1. Mass loss of the shell samples due to the etching.** The mass values before and after the etching were averaged by three measurements. Mass loss is calculated by subtracting the mass before the etching from the mass after the etching.

| Group No. | Etching site    | Sample No. | Mass before etching, mg | Mass after etching, mg | Mass loss, mg |
|-----------|-----------------|------------|-------------------------|------------------------|---------------|
| Group A   | Periostracum    | EA_S1      | 92.73                   | 92.53                  | 0.20          |
|           |                 | EA_S2      | 100.5                   | 99.9                   | 0.60          |
|           |                 | EA_S3      | 43.80                   | 43.63                  | 0.17          |
|           |                 | EA_S4      | 76.37                   | 76.47                  | -0.10         |
|           |                 | EA_S5      | 71.17                   | 71.16                  | 0.01          |
|           |                 | EA_S6      | 69.17                   | 68.80                  | 0.37          |
| Group B   | Prismatic layer | EB_S1      | 96.50                   | 96.07                  | 0.43          |
|           |                 | EB_S2      | 83.33                   | 82.87                  | 0.46          |
|           |                 | EB_S3      | 113.5                   | 113.6                  | -0.10         |
|           |                 | EB_S4      | 101.9                   | 101.6                  | 0.30          |
|           |                 | EB_S5      | 122.0                   | 121.8                  | 0.20          |
|           |                 | EB_S6      | 71.57                   | 71.37                  | 0.20          |
| Group C   | Nacre           | EC_S1      | 92.03                   | 91.40                  | 0.63          |
|           |                 | EC_S2      | 87.33                   | 86.17                  | 1.16          |
|           |                 | EC_S3      | 53.60                   | 53.20                  | 0.40          |
|           |                 | EC_S4      | 85.77                   | 85.13                  | 0.64          |
|           |                 | EC_S5      | 61.73                   | 60.40                  | 1.33          |
|           |                 | EC_S6      | 90.13                   | 89.73                  | 0.40          |

**Table S2. Contact area of water droplet on the shell samples of group D before and after the etching.** Contact area values before and after the etching were averaged for three measurements.

| Sample No. | Contact area on prismatic surface, mm <sup>2</sup> |               | Contact area on nacre surface, mm <sup>2</sup> |               |
|------------|----------------------------------------------------|---------------|------------------------------------------------|---------------|
|            | before etching                                     | after etching | before etching                                 | after etching |
| ED_S1      | 2.858                                              | 2.780         | 2.897                                          | 2.729         |
| ED_S2      | 3.777                                              | 2.869         | 2.801                                          | 3.273         |
| ED_S3      | 3.139                                              | 2.401         | 3.262                                          | 3.027         |
| ED_S4      | 3.206                                              | 2.809         | 2.765                                          | 3.262         |
| ED_S5      | 2.971                                              | 3.368         | 2.806                                          | 2.760         |
| ED_S6      | 3.250                                              | 2.418         | 2.734                                          | 2.985         |

**Table S3. Contact angle of water droplet on the shell samples of group D before and after the etching.** The values are averages of the angles from three measurements.

| Sample No. | Contact angle on prismatic surface, ° |               | Contact angle on nacre surface, ° |               |
|------------|---------------------------------------|---------------|-----------------------------------|---------------|
|            | before etching                        | after etching | before etching                    | after etching |
| ED_S1      | 61.3                                  | 75.5          | 71.3                              | 73.5          |
| ED_S2      | 60.1                                  | 73.5          | 69.0                              | 60.8          |
| ED_S3      | 65.3                                  | 76.6          | 71.2                              | 72.3          |
| ED_S4      | 61.0                                  | 67.8          | 70.3                              | 65.8          |
| ED_S5      | 54.9                                  | 67.7          | 63.8                              | 70.9          |
| ED_S6      | 64.7                                  | 78.6          | 64.1                              | 67.9          |

**Table S4. Static mechanical properties (elastic modulus and strength) of the beam shell samples under the out-in and in-out bending tests.**

| <b>Bending type</b> | <b>Sample No.</b> | <b>Static elastic modulus, GPa</b> | <b>Static ultimate strength, MPa</b> |
|---------------------|-------------------|------------------------------------|--------------------------------------|
| Out-in              | SO_S1             | 14.7                               | 129.7                                |
|                     | SO_S2             | 23.2                               | 161.9                                |
|                     | SO_S3             | 30.3                               | 86.1                                 |
|                     | SO_S4             | 28.4                               | 120.4                                |
|                     | SO_S5             | 26.1                               | 140.2                                |
|                     | SO_S6             | 21.3                               | 108.7                                |
|                     | SO_S7             | 41.2                               | 181.8                                |
|                     | SO_S8             | 19.3                               | 132.9                                |
|                     | SO_S9             | 27.3                               | 125.5                                |
|                     | SO_S10            | 45.3                               | 163.1                                |
|                     | SO_S11            | 35.0                               | 105.9                                |
|                     | SO_S12            | 20.0                               | 121.3                                |
| In-out              | SI_S1             | 29.2                               | 147.6                                |
|                     | SI_S2             | 41.3                               | 154.2                                |
|                     | SI_S3             | 33.2                               | 165.0                                |
|                     | SI_S4             | 35.3                               | 170.7                                |
|                     | SI_S5             | 39.1                               | 128.3                                |
|                     | SI_S6             | 53.9                               | 228.6                                |
|                     | SI_S7             | 35.2                               | 125.8                                |
|                     | SI_S8             | 54.4                               | 184.6                                |
|                     | SI_S9             | 28.6                               | 124.0                                |
|                     | SI_S10            | 34.3                               | 175.1                                |
|                     | SI_S11            | 38.2                               | 170.2                                |
|                     | SI_S12            | 55.0                               | 282.0                                |

**Table S5. Dynamic elastic modulus, strength and toughness of the beam shell samples under the out-in and in-out bending tests.**

| <b>Bending type</b> | <b>Sample No.</b> | <b>Dynamic elastic modulus, GPa</b> | <b>Dynamic ultimate strength, MPa</b> | <b>Toughness, J/mm<sup>2</sup></b> |
|---------------------|-------------------|-------------------------------------|---------------------------------------|------------------------------------|
| Out-in              | DO_S1             | 3.87                                | 9.66                                  | 0.0157                             |
|                     | DO_S2             | 2.05                                | 12.5                                  | 0.0439                             |
|                     | DO_S3             | 3.34                                | 16.5                                  | 0.0609                             |
|                     | DO_S4             | 2.38                                | 10.1                                  | 0.0418                             |
|                     | DO_S5             | 2.06                                | 8.37                                  | 0.0291                             |
|                     | DO_S6             | 2.17                                | 10.3                                  | 0.0504                             |
| In-out              | DI_S1             | 1.67                                | 8.02                                  | 0.0460                             |
|                     | DI_S2             | 1.23                                | 6.50                                  | 0.0421                             |
|                     | DI_S3             | 2.23                                | 9.95                                  | 0.0391                             |
|                     | DI_S4             | 3.24                                | 11.6                                  | 0.0420                             |
|                     | DI_S5             | 1.44                                | 8.25                                  | 0.0522                             |
|                     | DI_S6             | 4.13                                | 17.1                                  | 0.0747                             |

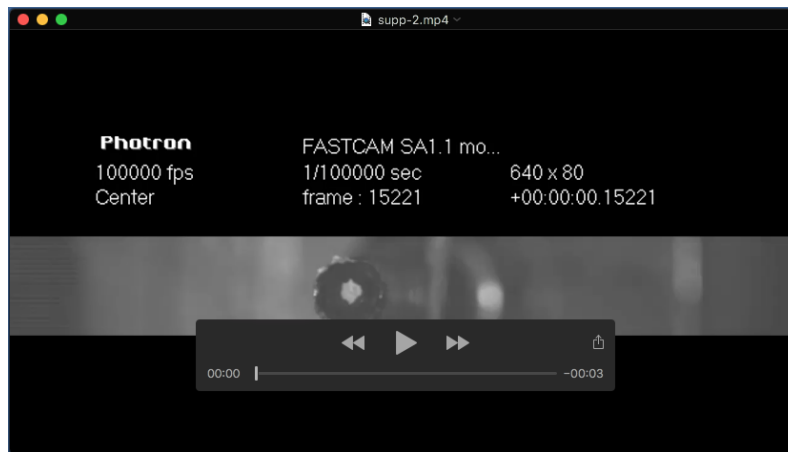

**Movie 1. Typical high-speed video in recording the dynamic out-in bending of shell sample from its lateral view.** The shell sample was shown in the middle of the field of view. The loading part of the impact tester translated from left to right in the video. Its velocity values before bending and after sample fracture were calculated by the movement of the white marker on its top surface.

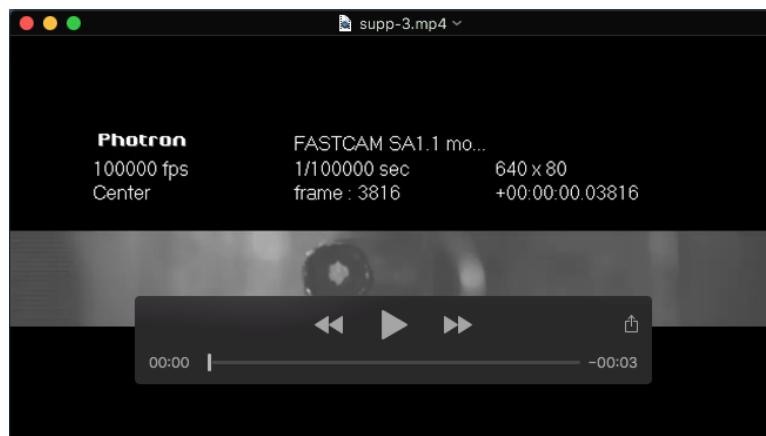

**Movie 2. Typical high-speed video in recording the dynamic in-out bending of shell sample from its lateral view.** The shell sample was shown in the middle of the field of view. The loading part of the impact tester translated from left to right in the video. Its velocity values before bending and after sample fracture were calculated by the movement of the white marker on its top surface.
